# Supplementary material for: Triple-Negative Apocrine Breast Carcinoma Has Better Prognosis despite Poor Response to Neoadjuvant Chemotherapy
Source: MDPI journal article supplement (doi:10.3390/jcm11061607), 2022-03-14
Supplement: s1 [file s1]

**Supplementary Table S1.** Clinical information of TNBC-NA patients who received neoadjuvant therapy.

|         | Neoadjuvant therapy | Clinical evaluation | T stage | N stage | MP grade | Ki67(%) | Histologic grade | TILs(%) | RCB index |
|---------|---------------------|---------------------|---------|---------|----------|---------|------------------|---------|-----------|
| TNBC-1  | ddEC                | PR                  | 2       | 0       | 5        | 30      | II               | 45      | 0         |
| TNBC-2  | TP1w/CEF            | PR/PR               | 2       | 0       | 2        | 5       | I                | 2       | II        |
| TNBC-3  | TP/CEF              | PR                  | 1       | 0       | 3        | 75      | II               | 20      | II        |
| TNBC-4  | ddEC/T1w            | PR                  | 1       | 3       | 2        | 15      | I                | 20      | III       |
| TNBC-5  | CEF                 | PD                  | 3       | 1       | 3        | 50      | III              | 1       | III       |
| TNBC-6  | TP                  | PR                  | 1       | 2       | 3        | 90      | II               | 25      | II        |
| TNBC-7  | ddEC/ddT175         | PR/Unk              | 1       | 1       | 3        | 40      | II               | 35      | II        |
| TNBC-8  | TP1w/CEF            | Unk                 | 1       | 0       | 3        | 10      | III              | 90      | II        |
| TNBC-9  | TP1w/TX/AC/NB       | SD/SD/PD/PR         | 4       | 0       | 2        | 60      | III              | 25      | II        |
| TNBC-10 | T1w                 | PR                  | 1       | 0       | 5        | 60      | III              | 5       | 0         |
| TNBC-11 | T1w                 | SD                  | 1       | 0       | 3        | 5       | II               | 5       | II        |
| TNBC-12 | ddEC/ddT            | SD/SD               | 1       | 1       | 3        | 30      | II               | 15      | II        |
| TNBC-13 | ddEC/ddT175         | SD/Unk              | 2       | 1       | 2        | 75      | II               | 20      | III       |
| TNBC-14 | CEF                 | PR                  | 1       | 0       | 2        | 75      | III              | 35      | II        |
| TNBC-15 | TF/NP               | PD/PR               | 2       | 0       | 2        | 60      | III              | 0       | II        |

|         |            |          |   |   |   |    |     |     |    |
|---------|------------|----------|---|---|---|----|-----|-----|----|
| TNBC-16 | TP/CEF/NP  | PR/PR/CR | 1 | 0 | 3 | 40 | II  | 70  | II |
| TNBC-17 | T1w/CEF/NP | PR       | 1 | 0 | 3 | 40 | II  | 2   | II |
| TNBC-18 | EC/TX      | PR/PR    | 1 | 1 | 3 | 30 | II  | 2   | II |
| TNBC-19 | TX/NP      | SD/PR    | 4 | 2 | 4 | 80 | II  | 10  | II |
| TNBC-20 | ddEC/T1w   | PR/PR    | 1 | 0 | 5 | 70 | III | 5   | 0  |
| TNBC-21 | TX/EC      | SD/PR    | 2 | 1 | 5 | 75 | Unk | Unk | 0  |

---

Abbreviations: A—doxorubicin; B—bevacizumab; C—cyclophosphamide; D—daunorubicin; E—epirubicin; F— fluorouracil; N—vinorelbine; P—platin; T—docetaxel or paclitaxel; Unk-Unknown; X—xeloda.
